# Supplementary material for: Plate-scale crustal strain patterns (2009-2023) preceding the 2023 Turkey-Syria earthquake pair (Mw 7.8, 7.7) coupled with the Anatolian extrusion regime (Anatolian diagonal, Turkey): Inferences from geodetic and earthquake data
Source: Research Square preprint supplement (doi:10.21203/rs.3.rs-8630979/v1), 2026-01-21
Supplement: Supplementary file 1 [file 855cc5821d317ff1cf552c66.docx]

**Supplementary material 1 (S1) of the GPS data:** the selected samples of the time series of the used stations (2009-2022), BTMN, ERGN, ERZ2, FEEK, HORS, ONIY, RDIY, VIR2, show the quality of the processed GPS data and the calculated velocity components (*Vnorth, Veast, Vup*) associated with the velocity uncertainties, less than ~1 mm/year, Weighted Root Mean Square (WRMS), less than ~8 mm/year, and Normalized Root Mean Square (NRMS), less than ~5 mm/year, while the northern and eastern components range from ~160 to -160 mm.

The time series logging document of the used GPS sites and further details are provided by <https://www.harita.gov.tr/public/sunum/> and detailed geodetic measurements associated with used methods such as the 2D-/3D datum and coordinate transformations from WGS84 to ED50 (and *vice versa*) are given by <https://www.harita.gov.tr/temel-jeodezik-hesaplamalar>


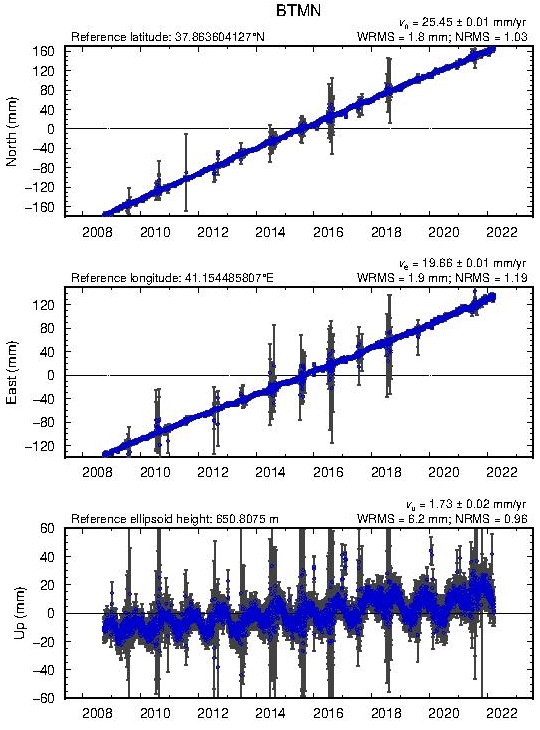

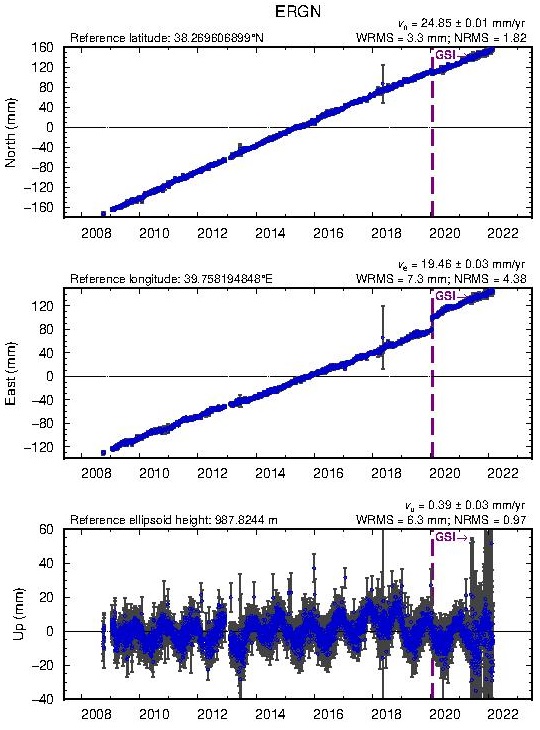


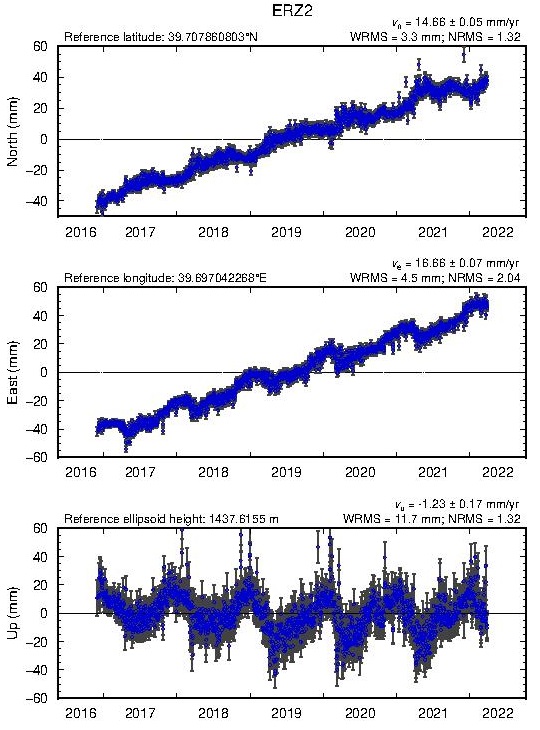

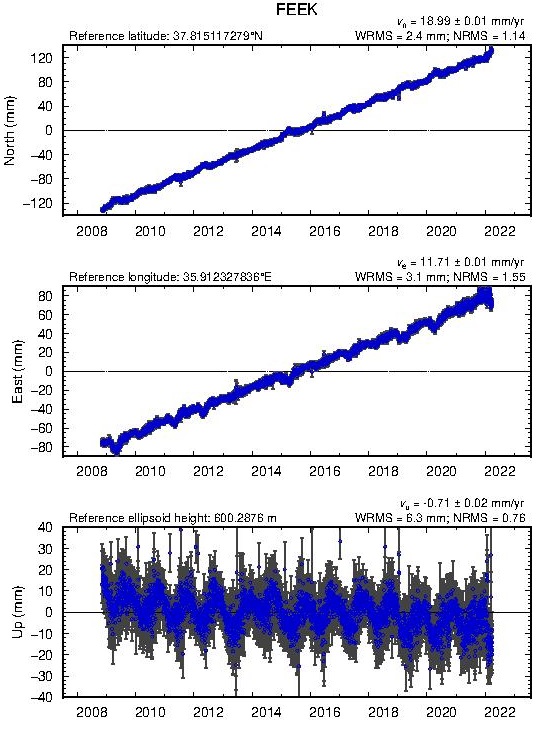


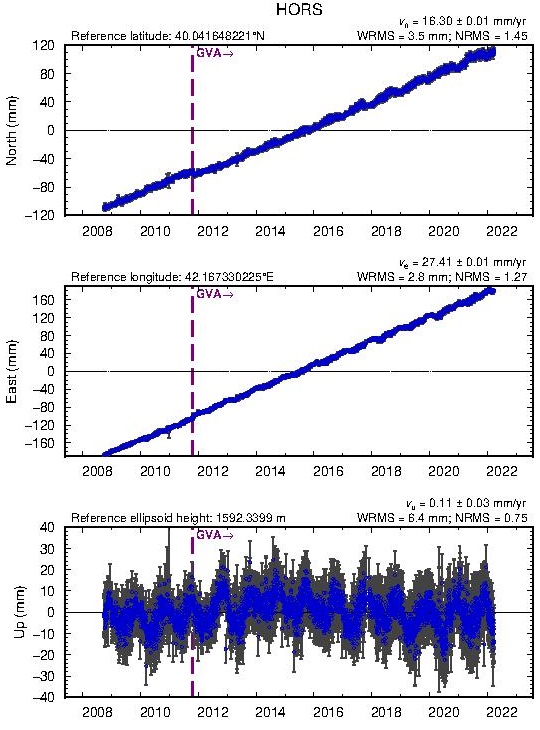

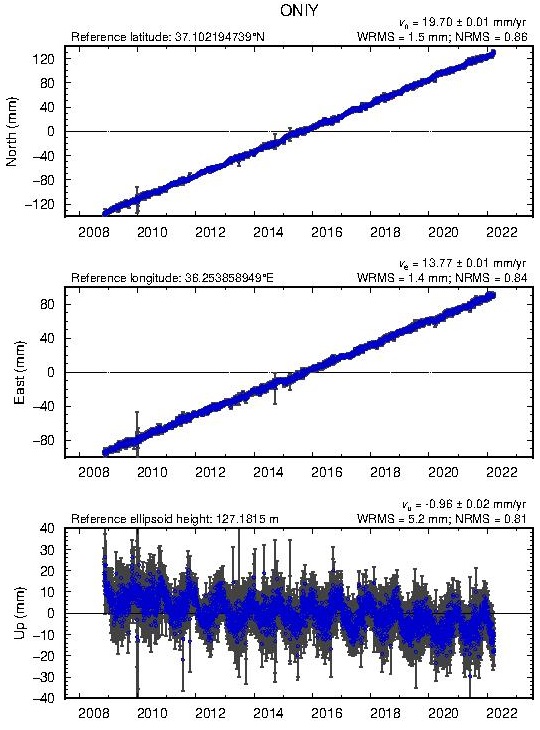


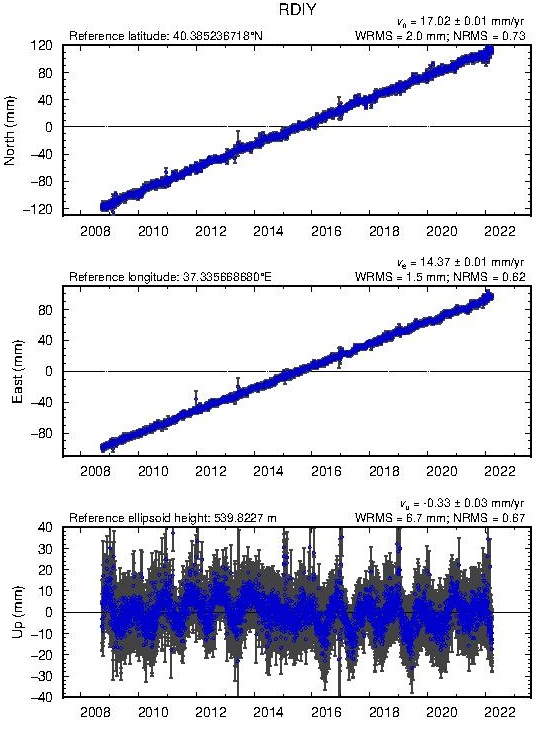

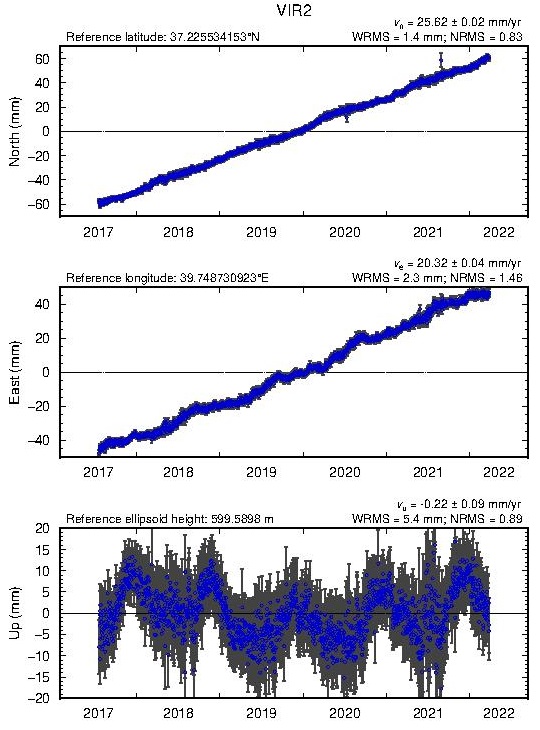


**Fig. S1.** The time series of the selected stations, the velocity components (mm/year) and displacements (mm) between 2009 and 2022, BTMN, ERGN, ERZ2, FEEK, HORS, ONIY, RDIY, VIR2, showing the high accuracy of the GNSS site measurements.
