# Supplementary material for: Plate-scale crustal strain patterns (2009-2023) preceding the 2023 Turkey-Syria earthquake pair (Mw 7.8, 7.7) coupled with the Anatolian extrusion regime (Anatolian diagonal, Turkey): Inferences from geodetic and earthquake data
Source: Research Square preprint supplement (doi:10.21203/rs.3.rs-8630979/v1), 2026-01-21
Supplement: Supplementary file 2 [file bd2b95f292072e46443c5323.docx]

**Supplementary material 2 (S2) of the CMT solution of off-fault aftershock sequence:** CMT solution sample of #5 shown in Table 2 and Fig. 9.

**
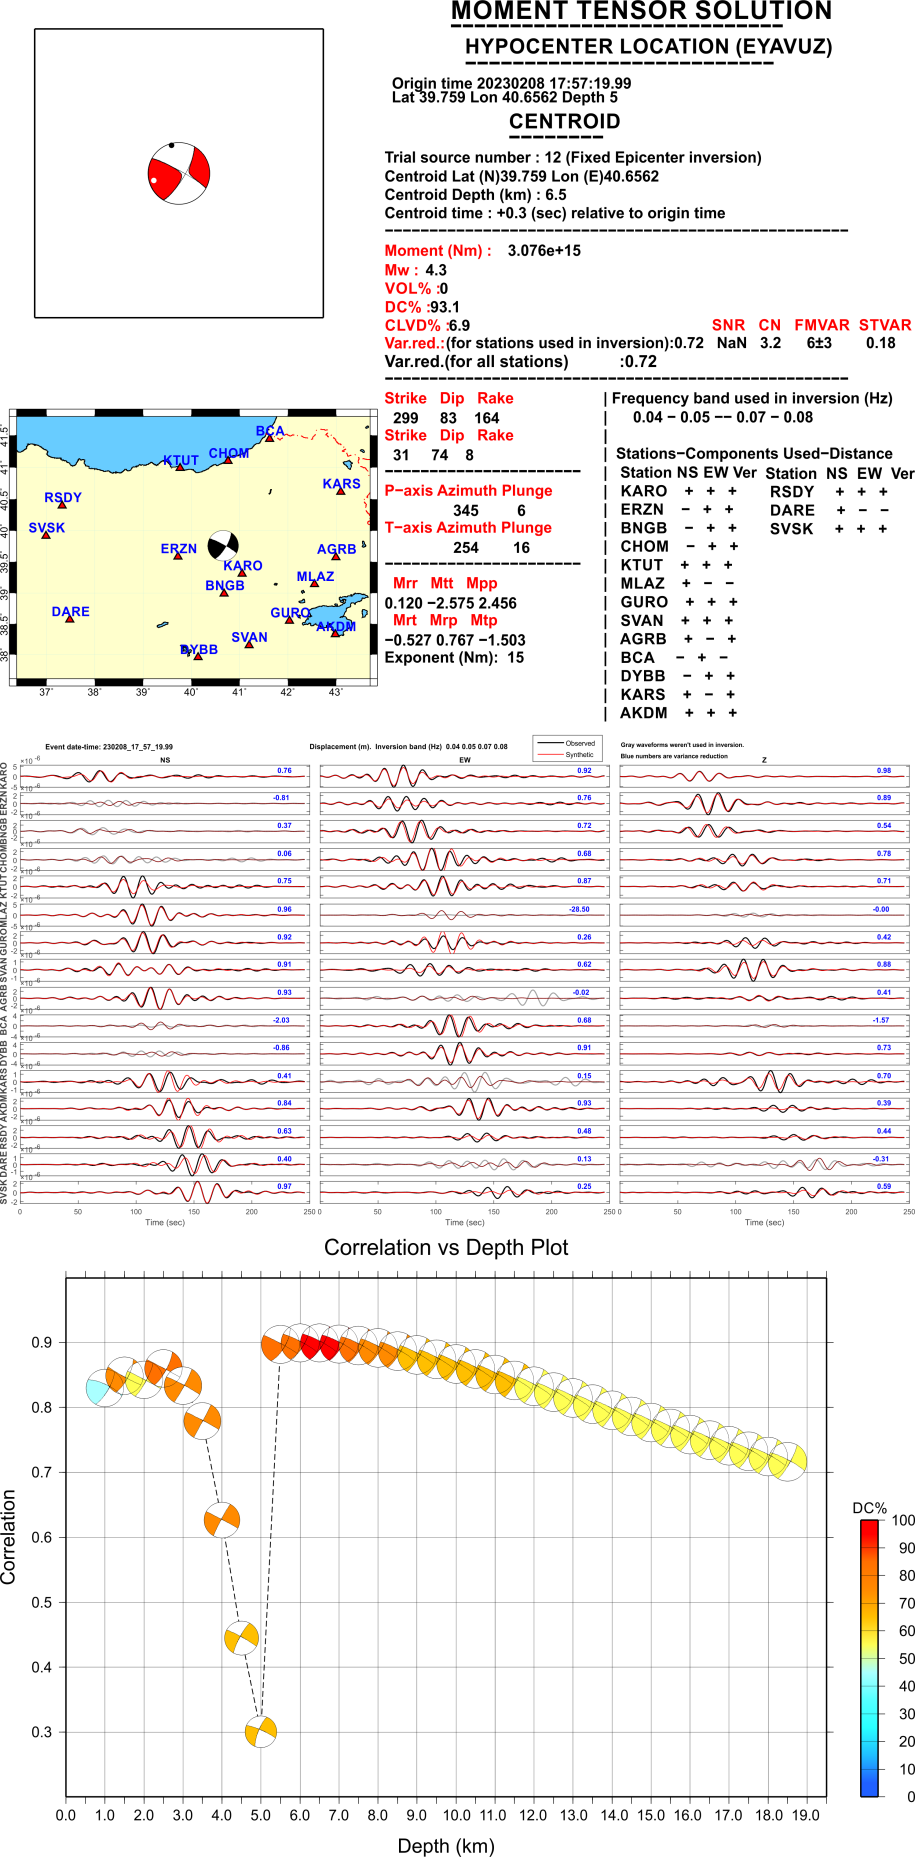
**

**Figure S2.** CMT solution (#5 in Table 2, Fig. 9) shows source mechanisms, frequency range, station components-distribution, waveform fits, correlation vs focal depth search (DC%), the same as those in Figs. S3-S8.

**S3: CMT solution sample of #11 shown in Table 2 and Fig. 9;**

**
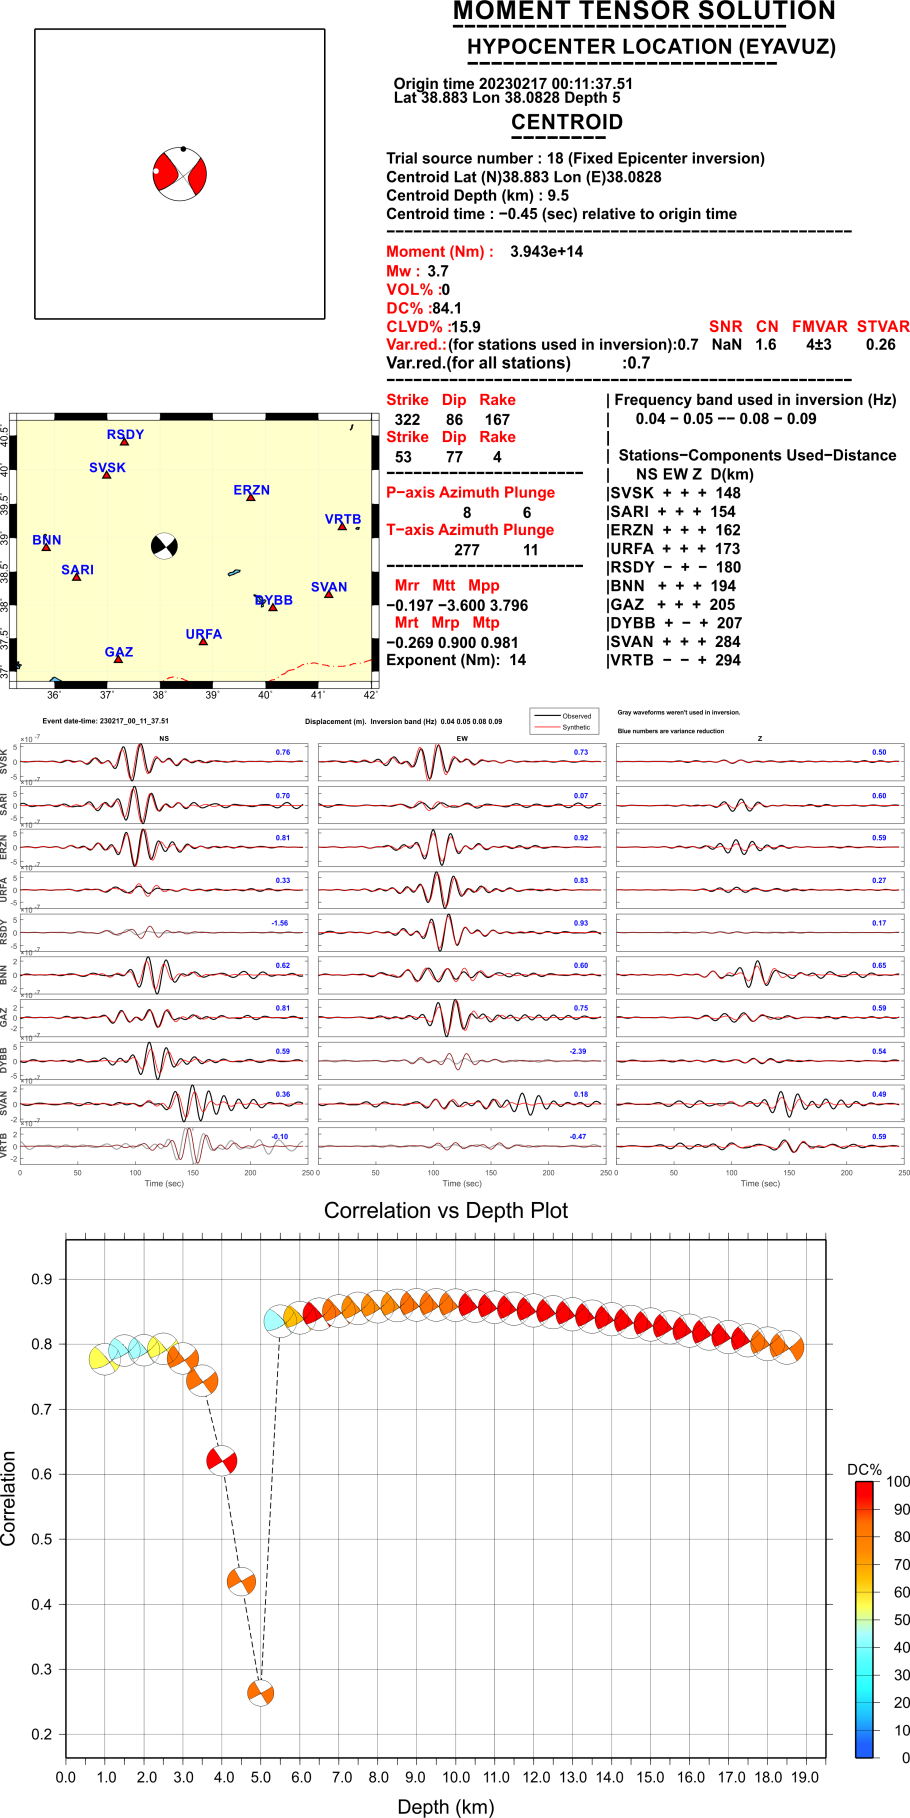
**

**Figure S3.**

**S4: CMT solution sample of #12 shown in Table 2 and Fig. 9;**

**
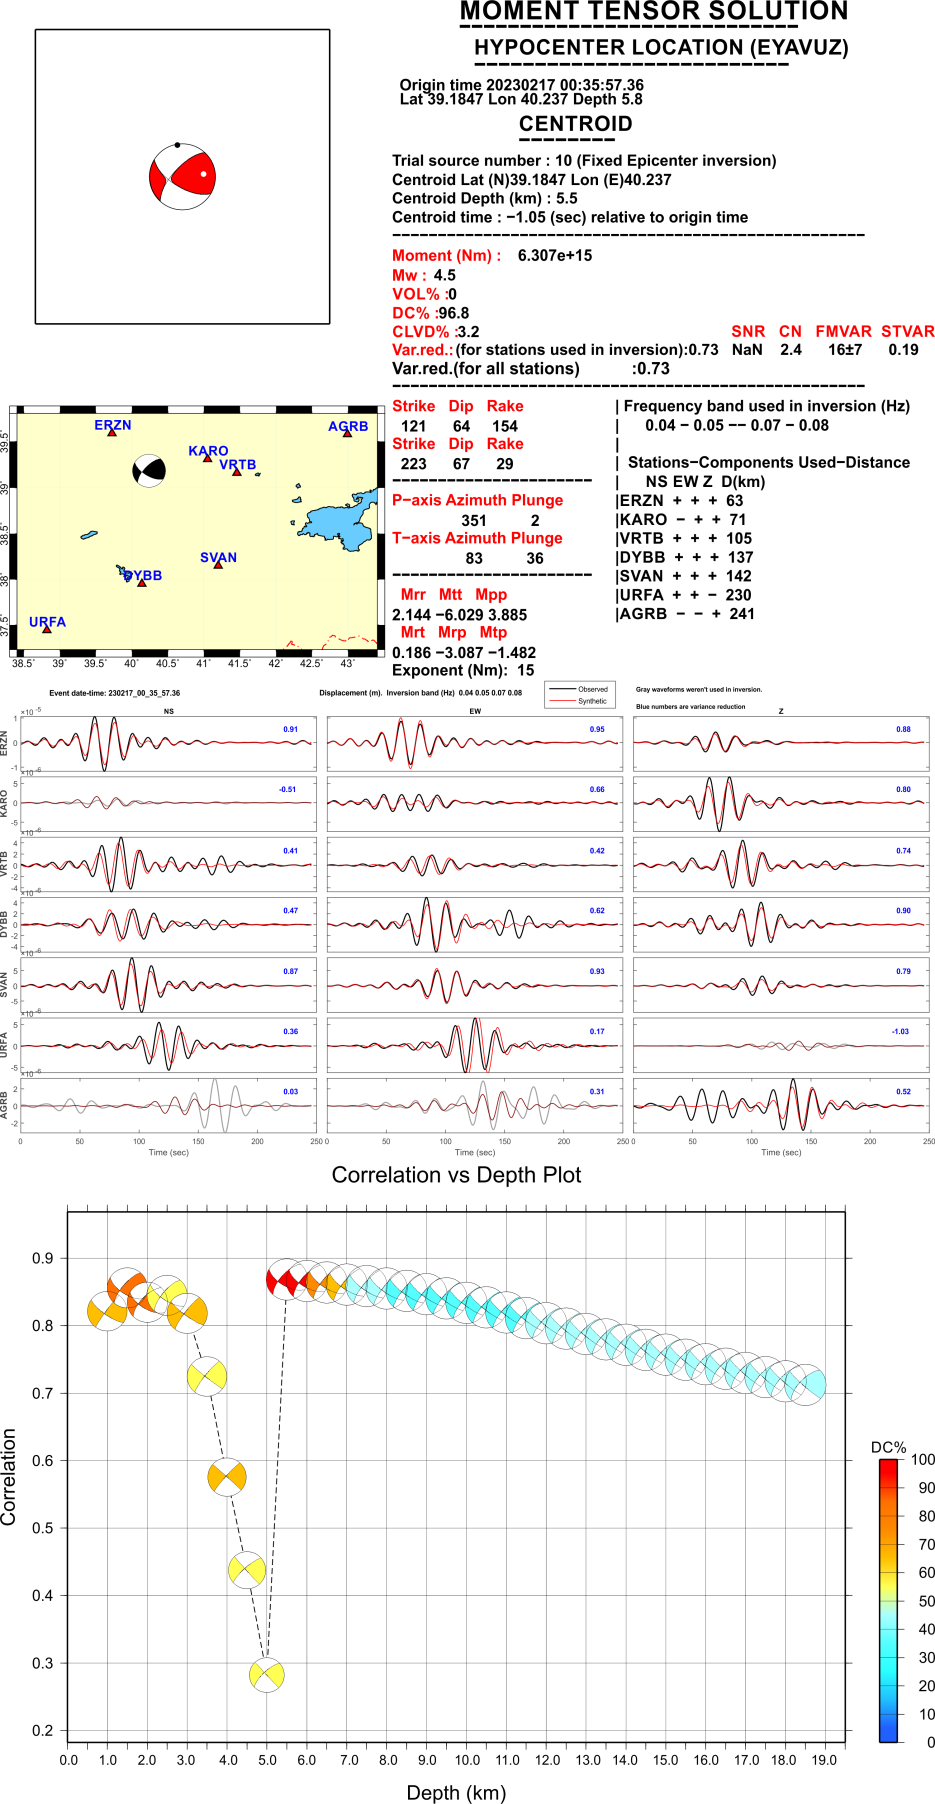
**

**Figure S4.**

**S5: CMT solution sample of #17 shown in Table 2 and Fig. 9;**

**
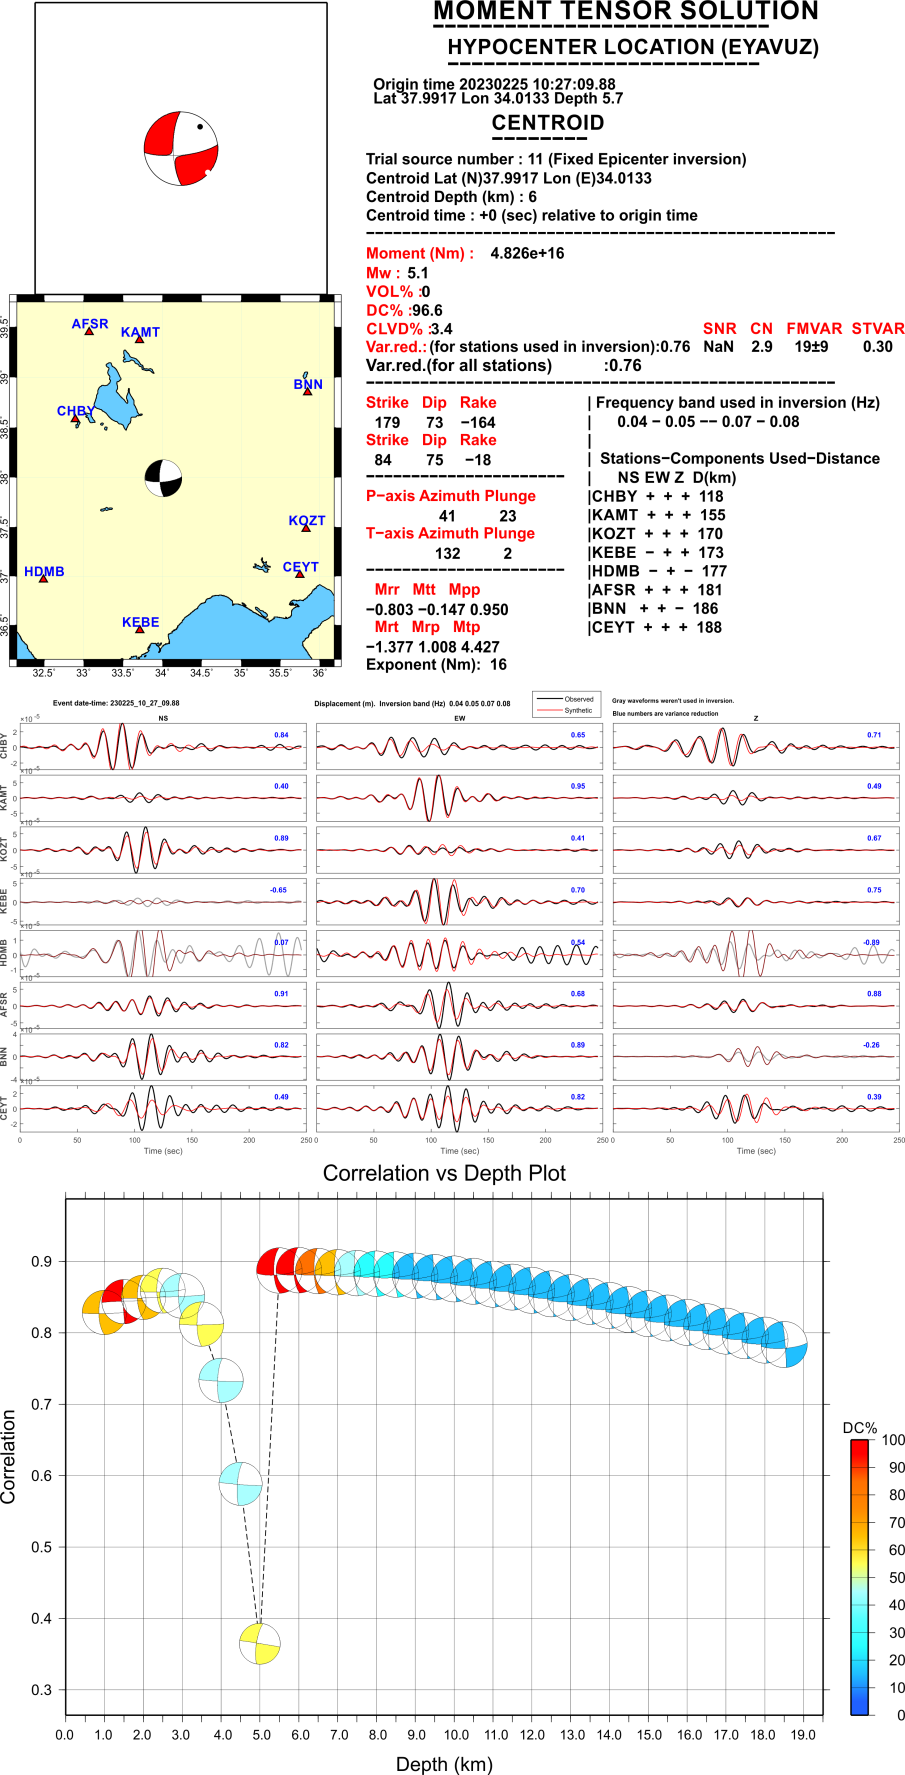
**

**Figure S5.**

**S6: CMT solution sample of #18 shown in Table 2 and Fig. 9;**

**
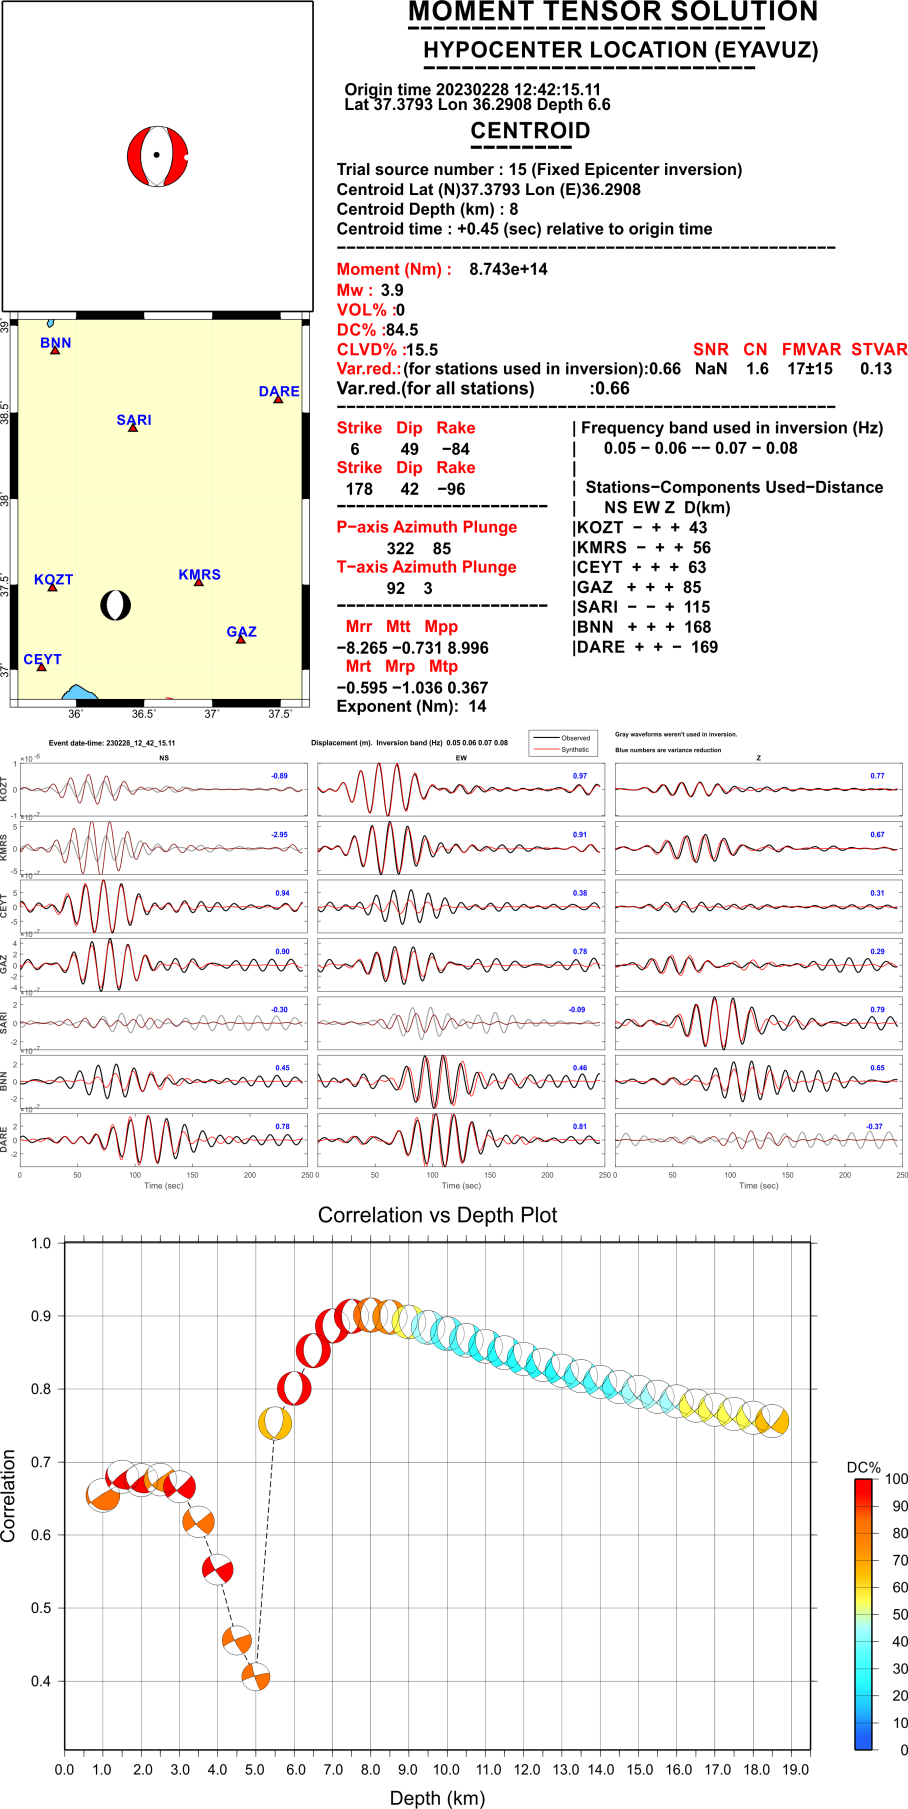
**

**Figure S6.**

**S7: CMT solution sample of #38 shown in Table 2 and Fig. 9;**

**
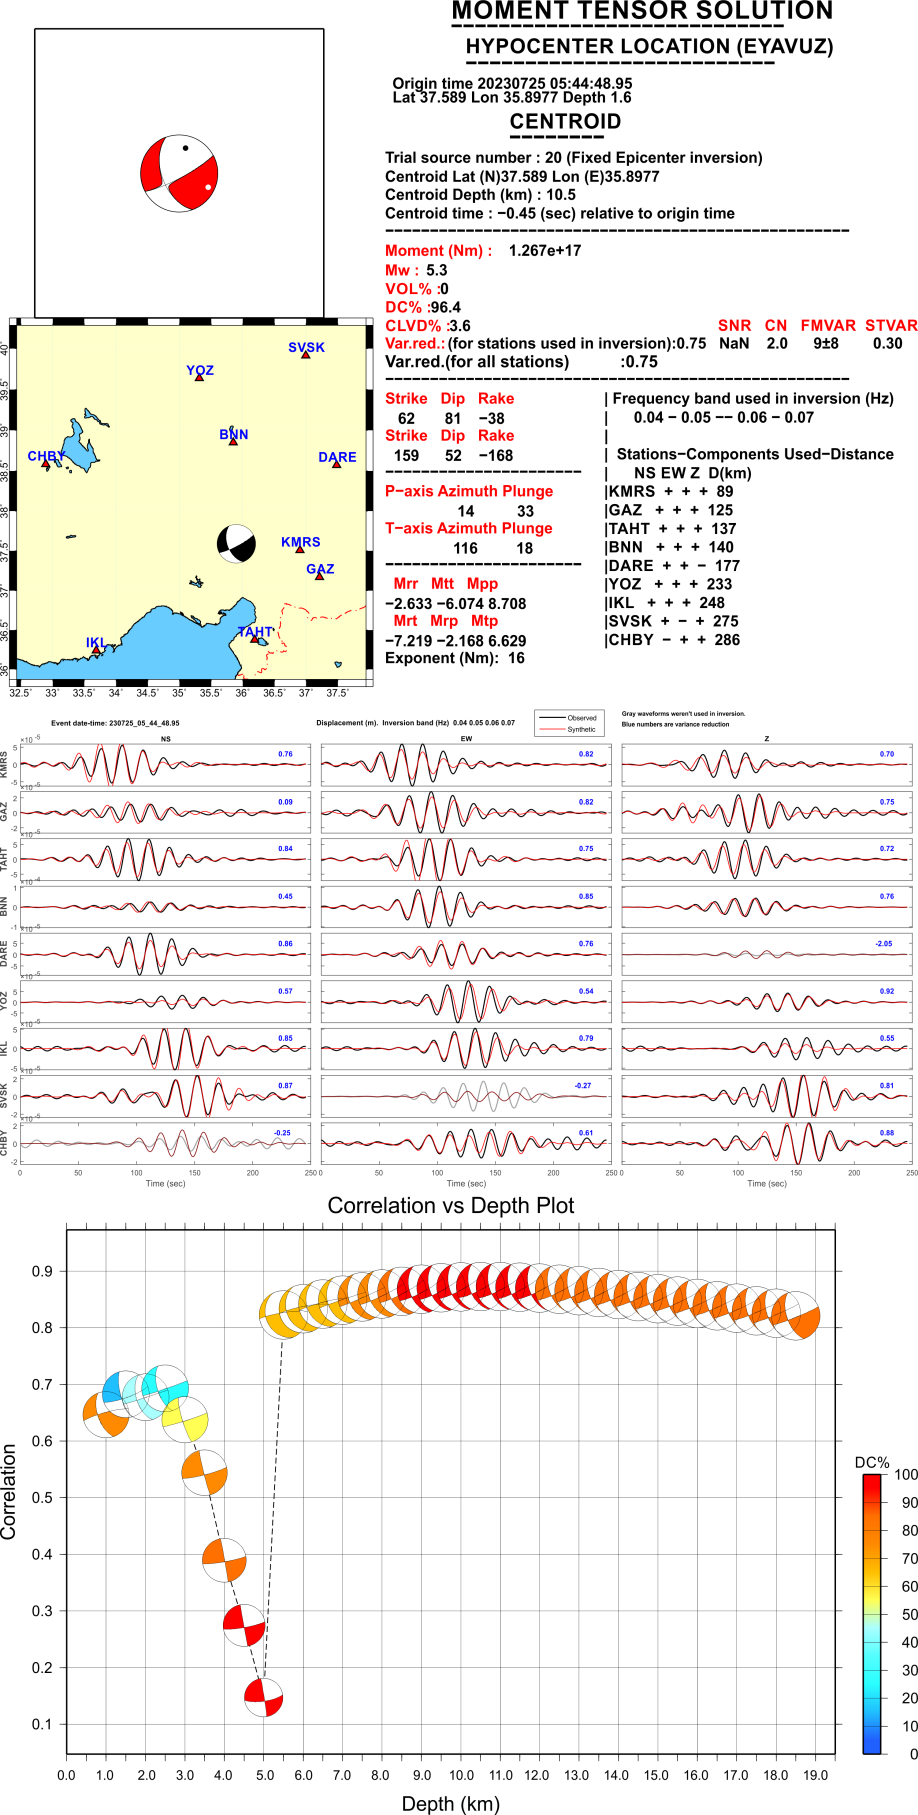
**

**Figure S7.**

**S8: CMT solution sample of #40 shown in Table 2 and Fig. 9;**

**
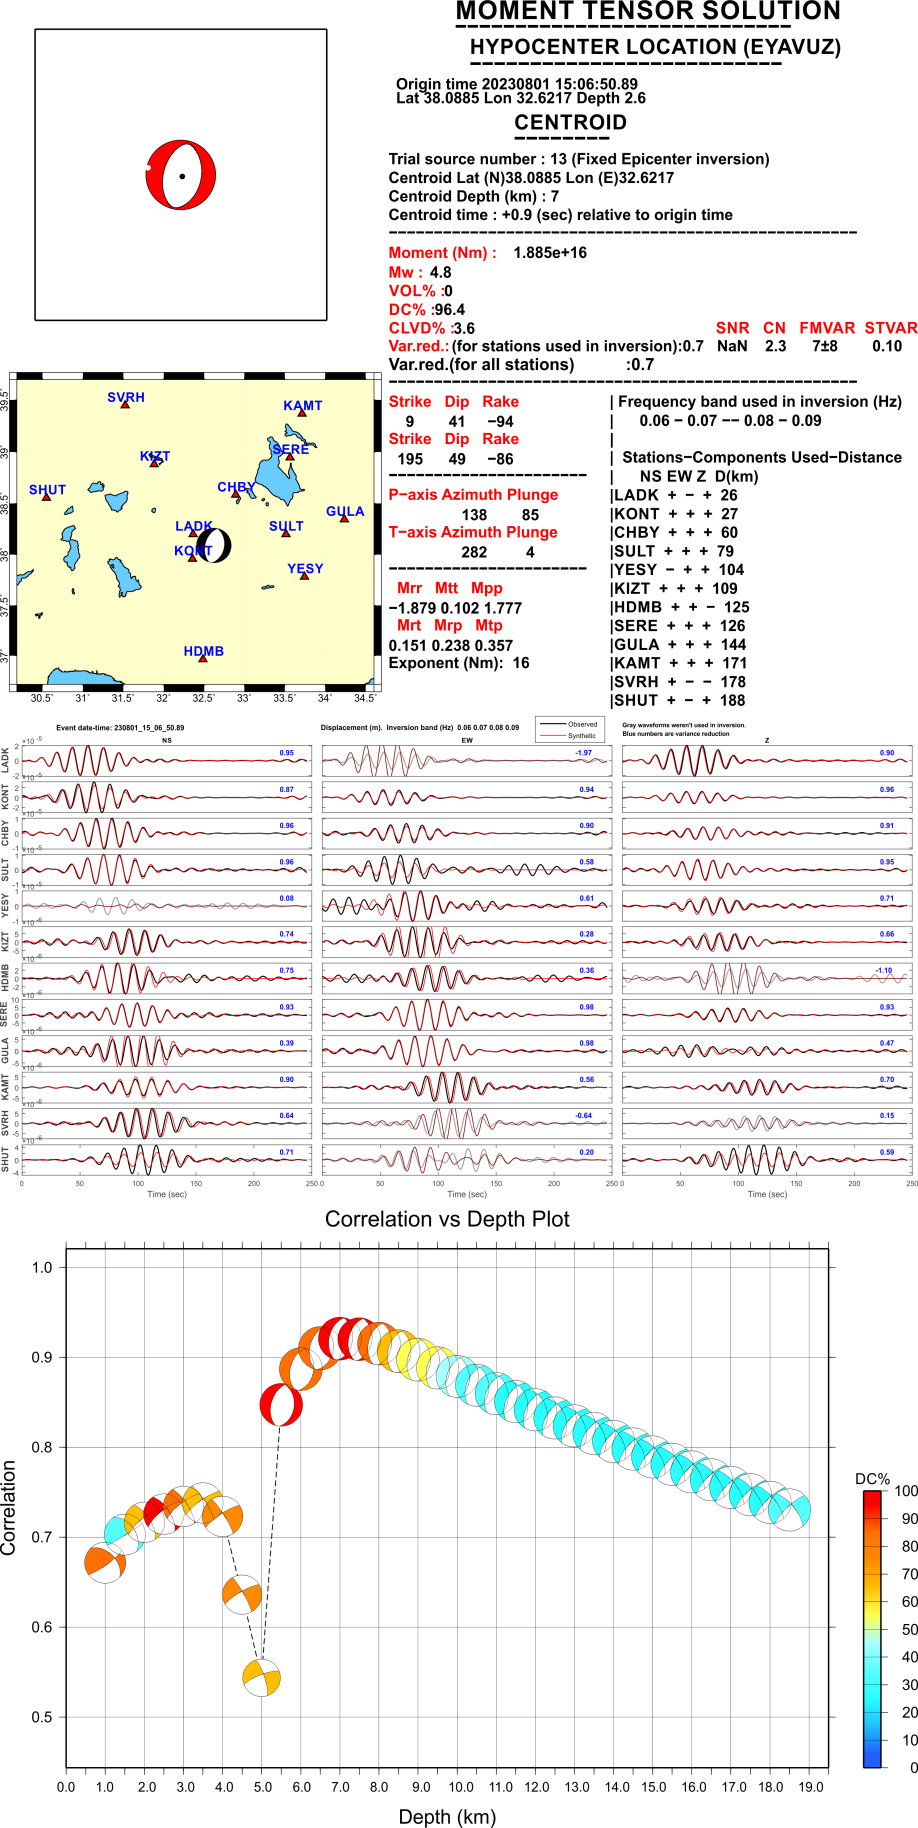
**

**Figure S8.**
